# Supplementary figures and images for: Risk of Hospitalization and Use of First- Versus Second-Generation Antipsychotics Among Nursing Home Residents
Source: Atypon-hosted journal article supplement (doi:10.1176/appi.ps.201300093), 2014-02-18

**ONLINE: Identification Process for Selection of Final Cohort**

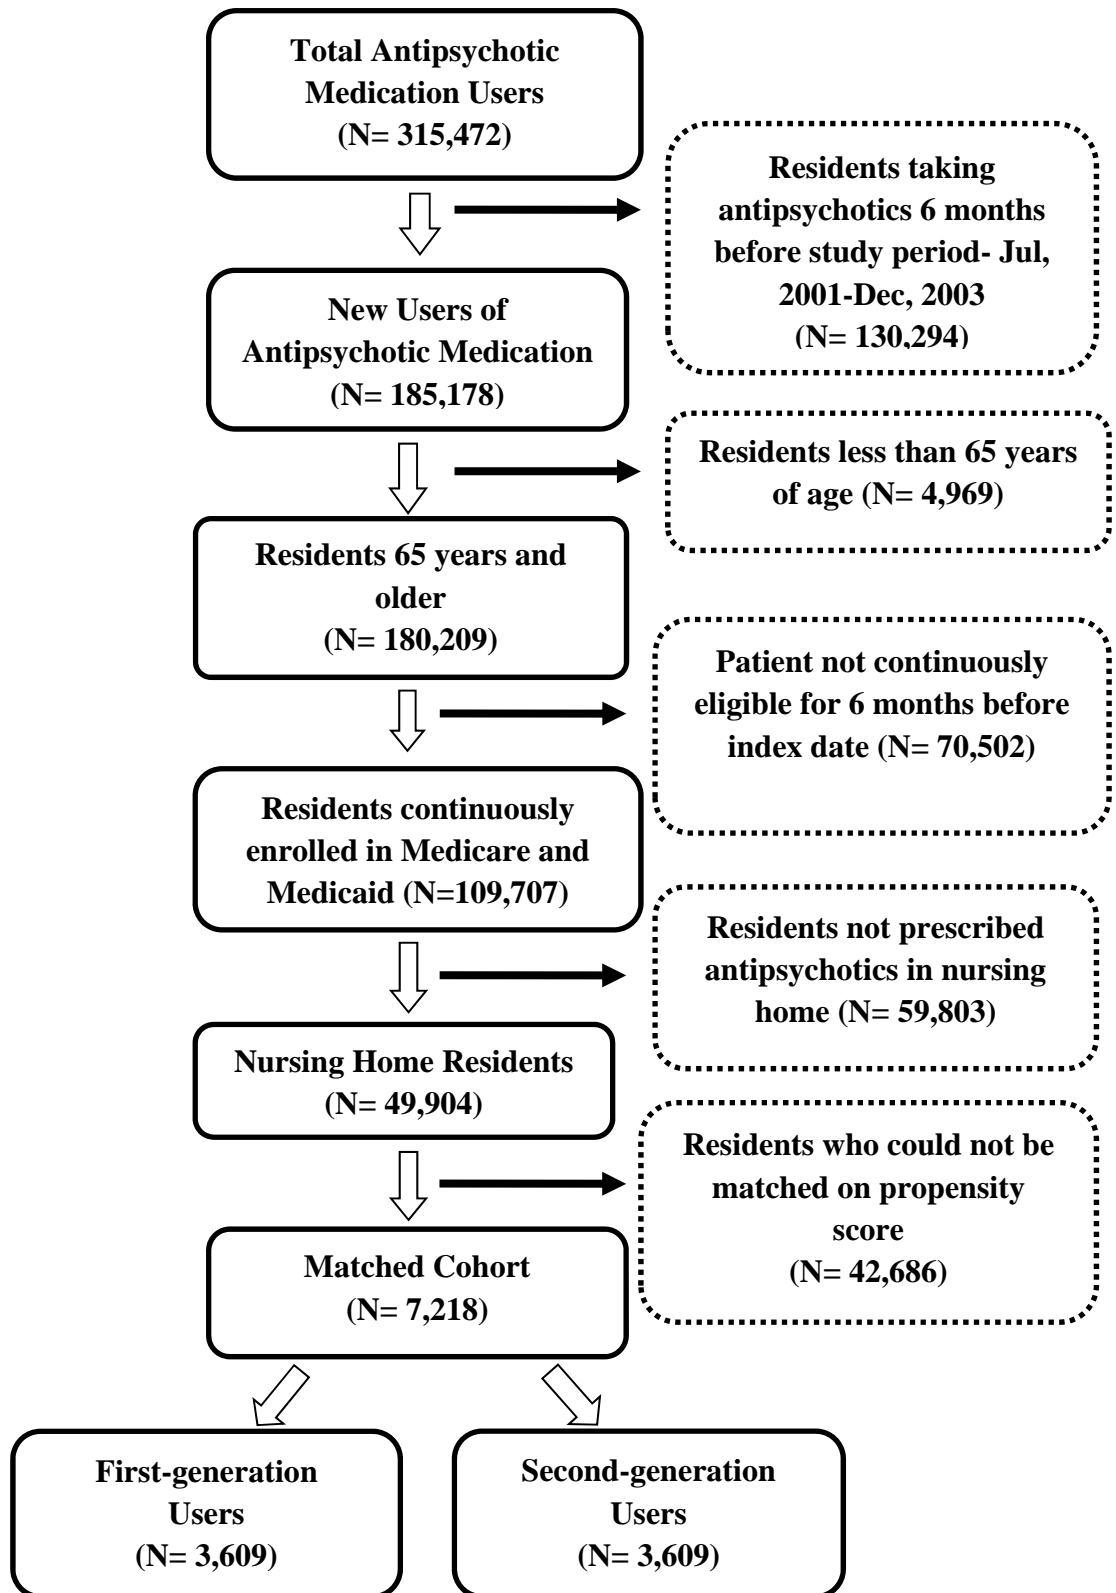

Supplement: 781_ds001.pdf [file 781_ds001.pdf]
